## Plasma tau predicts cerebral vulnerability in aging

Jose L. Cantero<sup>1,2</sup>, Mercedes Atienza<sup>1,2</sup>, Jaime Ramos-Cejudo<sup>3</sup>, Silvia Fossati<sup>4</sup>, Thomas Wisniewski<sup>5</sup>, Ricardo S. Osorio<sup>3</sup>

<sup>1</sup>Laboratory of Functional Neuroscience, Pablo de Olavide University, Seville, Spain

<sup>2</sup>CIBERNED, Network Center for Biomedical Research in Neurodegenerative Diseases, Madrid, Spain

<sup>3</sup>Division of Brain Aging, Department of Psychiatry, New York University School of Medicine, New York, NY 10016, USA

<sup>4</sup>Alzheimer's Center at Temple, Lewis Katz School of Medicine, Temple University, Philadelphia, PA 19140, USA

<sup>5</sup>Departments of Neurology, Pathology and Psychiatry, Center for Cognitive Neurology, New York University School of Medicine, New York, NY 10016, USA

**Correspondence to:** Jose L. Cantero; **email:** [jcanlor@upo.es](mailto:jcanlor@upo.es)

**Keywords:** aging, plasma tau, cerebral vulnerability, cortical thickness, FDG-PET

**Received:** June 13, 2020

**Accepted:** August 25, 2020

**Published:** November 4, 2020

**Copyright:** © 2020 Cantero et al. This is an open access article distributed under the terms of the [Creative Commons Attribution License](https://creativecommons.org/licenses/by/3.0/) (CC BY 3.0), which permits unrestricted use, distribution, and reproduction in any medium, provided the original author and source are credited.

### ABSTRACT

Identifying cerebral vulnerability in late life may help prevent or slow the progression of aging-related chronic diseases. However, non-invasive biomarkers aimed at detecting subclinical cerebral changes in the elderly are lacking. Here, we have examined the potential of plasma total tau (t-tau) for identifying cerebral and cognitive deficits in normal elderly subjects. Patterns of cortical thickness and cortical glucose metabolism were used as outcomes of cerebral vulnerability. We found that increased plasma t-tau levels were associated with widespread reductions of cortical glucose uptake, thinning of the temporal lobe, and memory deficits. Importantly, tau-related reductions of glucose consumption in the orbitofrontal cortex emerged as a determining factor of the relationship between cortical thinning and memory loss. Together, these results support the view that plasma t-tau may serve to identify subclinical cerebral and cognitive deficits in normal aging, allowing detection of individuals at risk for developing aging-related neurodegenerative conditions.

### INTRODUCTION

Tau is a multifunctional microtubule-associated protein that results from alternative splicing of the *MAPT* gene [1] and is mainly expressed in the axons of neurons [2]. Under normal conditions, tau protein exists in soluble forms and its primary function is to regulate the assembly and maintenance of the structural stability of microtubules [3–4]. However, in Alzheimer's disease (AD) and other tauopathies, tau protein is accumulated resulting in post-translational modifications, the most important of which is hyperphosphorylation [5], that ultimately lead to aggregation into neurofibrillary tangles and neuronal death [6].

Despite intense investigation, pathways leading to tau-mediated neurotoxicity remain largely unknown. Accumulated evidence suggests that soluble, rather than aggregated, are the most deleterious forms of tau. Accordingly, previous studies have supported a role of soluble tau species in cell dysfunctions, synaptic loss and neuronal death [7]. More specifically, soluble tau oligomers have been shown to induce synaptic and mitochondrial dysfunctions [8–10], playing a critical role in the initiation and propagation of tau pathology in a prion-like manner [11].

There is a broad consensus that total tau (t-tau) is a marker of axonal and neuronal damage [12, 13] that increases with age [14]. Although t-tau is not specific to

AD [12], increased t-tau levels in cerebrospinal fluid (CSF) are thought to reflect the intensity of neurodegeneration in the prodromal and clinical stages of AD [15–17], and may help to differentiate individuals at risk for developing AD from controls [18]. In addition, CSF t-tau has been related to cerebral hypometabolism in AD [19], as measured by 2-[18F] fluoro-2-deoxy-D-glucose-positron emission tomography (FDG-PET), a surrogate marker of reduced synaptic activity [20, 21]. The association between increased t-tau and cerebral hypometabolism become stronger when abnormal levels of amyloid-beta 42 ( $A\beta_{1-42}$ ) coexist in AD patients [22–24] and cognitively normal older adults [25, 26].

Tau levels can be examined in living individuals by analyzing CSF samples or by administering tau-specific ligands for use with positron emission tomography (PET) [27, 28]. However, the high cost, insufficient accessibility, or invasiveness of these techniques limits their use for screening purposes in the general population. Accumulated evidence suggests that t-tau can also be reliably measured in blood plasma. While previous studies have shown elevated plasma t-tau concentrations in AD patients compared to controls [29–33], the lack or weak correlations between CSF and plasma tau levels [29, 34], and the considerable overlap between groups [29, 35] hinders clinical translation. One possible explanation for this lack of diagnostic sensitivity is that impaired blood-brain barrier (BBB) not only occurs in AD patients but also in normal elderly individuals with early cognitive dysfunctions [36], thereby affecting plasma t-tau concentration in an unpredictable manner.

Although plasma t-tau may not be valid for diagnosis of prodromal and clinical AD, its elevated concentration has been associated with patterns of cortical thinning across MCI patients [35], lower gray matter density across the aging-AD continuum [30], delayed recall in AD [33], and cognitive decline in MCI patients when combined with plasma  $A\beta_{1-42}$  [37]. However, it remains unknown whether increased plasma t-tau also parallels subclinical cerebral and cognitive deficits in normal aging. Interestingly, recent evidence has shown that plasma t-tau reflects brain soluble, extracellular tau levels in the absence of tau pathology [38], suggesting that increased plasma t-tau in normal aging may indirectly signal subtle neuronal damage before neurodegeneration occurs.

The current study has been specifically designed to gain insight into these questions. We first examined whether plasma t-tau levels were associated with structural and metabolic cortical changes in cognitively normal older adults, as revealed by variations in cortical thickness

and cortical glucose metabolism respectively. Given the tight relationship between tau and cerebral glucose hypometabolism [19], we hypothesized that increased plasma t-tau would be associated with deficits in cortical glucose uptake rather than with patterns of cortical thinning, likely reflecting decreased synaptic activity preceding cell shrinkage, reduced dendritic extent, and/or synaptic loss in vulnerable aging. We next investigated whether plasma t-tau and tau-related changes in cortical glucose metabolism and/or cortical thickness were linked to subclinical cognitive deficits in aging. Based on previous findings suggesting that higher plasma t-tau is associated with lower memory performance in MCI/AD [35], our prediction was that increased plasma t-tau and tau-related structural/metabolic cortical changes would be associated with poorer memory outcomes in cognitively normal older adults. As circulating  $A\beta$  may be a moderator of these relationships, the potential main and confounding effect of plasma  $A\beta$  was also evaluated.

## RESULTS

### Higher plasma tau correlates with poorer memory and lower $A\beta_{1-42}$ in aging

Plasma t-tau, plasma  $A\beta$ , and cognitive scores were normally distributed, thus allowing for the use of parametric statistical tests. Table 1 shows the characteristics of the cohort. While increased t-tau was associated with worse immediate free recall ( $r = -0.49$ ,  $p = 0.005$ ;  $\beta = -0.39$ ,  $CI_{95\%} = [-16.2 -3.0]$ ), higher  $A\beta_{1-42}$  was related to more self-reported memory complaints (Figure 1). More specifically, increased  $A\beta_{1-42}$  was associated with higher frequency of forgetting ( $r = 0.55$ ,  $p = 0.002$ ;  $\beta = 0.44$ ,  $CI_{95\%} = [17.7 71.3]$ ) and poorer memory of past events ( $r = -0.54$ ,  $p = 0.001$ ;  $\beta = -0.47$ ,  $CI_{95\%} = [-26.3 -7.2]$ ). Plasma t-tau or  $A\beta$  species were unrelated to other cognitive domains.

Based on evidence supporting the synergy between cerebral  $A\beta$  and tau in both AD [46, 47] and normal aging [48], we examined if this relationship extended to blood plasma in cognitively normal elderly subjects. Our analyses showed that t-tau and  $A\beta_{1-42}$  significantly predicted each other (*t-tau*:  $r = -0.46$ ,  $p = 0.007$ ;  $\beta = -0.35$ ,  $CI_{95\%} = [-0.3 -0.05]$ ;  *$A\beta_{1-42}$* :  $r = -0.4$ ,  $p = 0.007$ ;  $\beta = -0.37$ ,  $CI_{95\%} = [-1.3 -0.2]$ ) (Figure 1). In contrast, t-tau and  $A\beta_{1-40}$  did not reveal a significant association.

### Higher plasma tau correlates with widespread reduction of cortical glucose uptake and thinning of the temporal cortex in aging

Having established the relationship between plasma t-tau and  $A\beta_{1-42}$  or memory performance, we next

**Table 1. Characteristics of the study sample.**

|                             |                            |
|-----------------------------|----------------------------|
| Age (yrs)                   | 67.7 ± 3.4 (62-78)         |
| Sex (M/F)                   | 27/30                      |
| CDR                         | 0                          |
| MMSE                        | 29 ± 1.4 (26-30)           |
| MFQ-forgetting              | 40 ± 11 (20-63)            |
| MFQ-past events             | 17.7 ± 3.9 (8-24)          |
| FCSRT-immediate free recall | 24.7 ± 5.3 (12-36)         |
| TOL                         | 399.2 ± 145.5 (186-814)    |
| PSI                         | 116.8 ± 11 (89-142)        |
| Total tau (pg/ml)           | 3.1 ± 1.5 (0.8-6.9)        |
| Aβ <sub>1-40</sub> (pg/ml)  | 231.2 ± 35.6 (165.7-331.6) |
| Aβ <sub>1-42</sub> (pg/ml)  | 25.5 ± 6.5 (14-46.7)       |

M: male, F: female. CDR: Clinical Dementia Rating; MMSE: Mini Mental State Examination; MFQ: Memory Functioning Questionnaire; FCSRT: Free and Cued Selective Reminding Test; TOL: Tower of London; PSI: processing speed index (PSI) from the Wechsler Adult Intelligence Scale-III. Results are expressed as mean ± standard deviation (min-max).

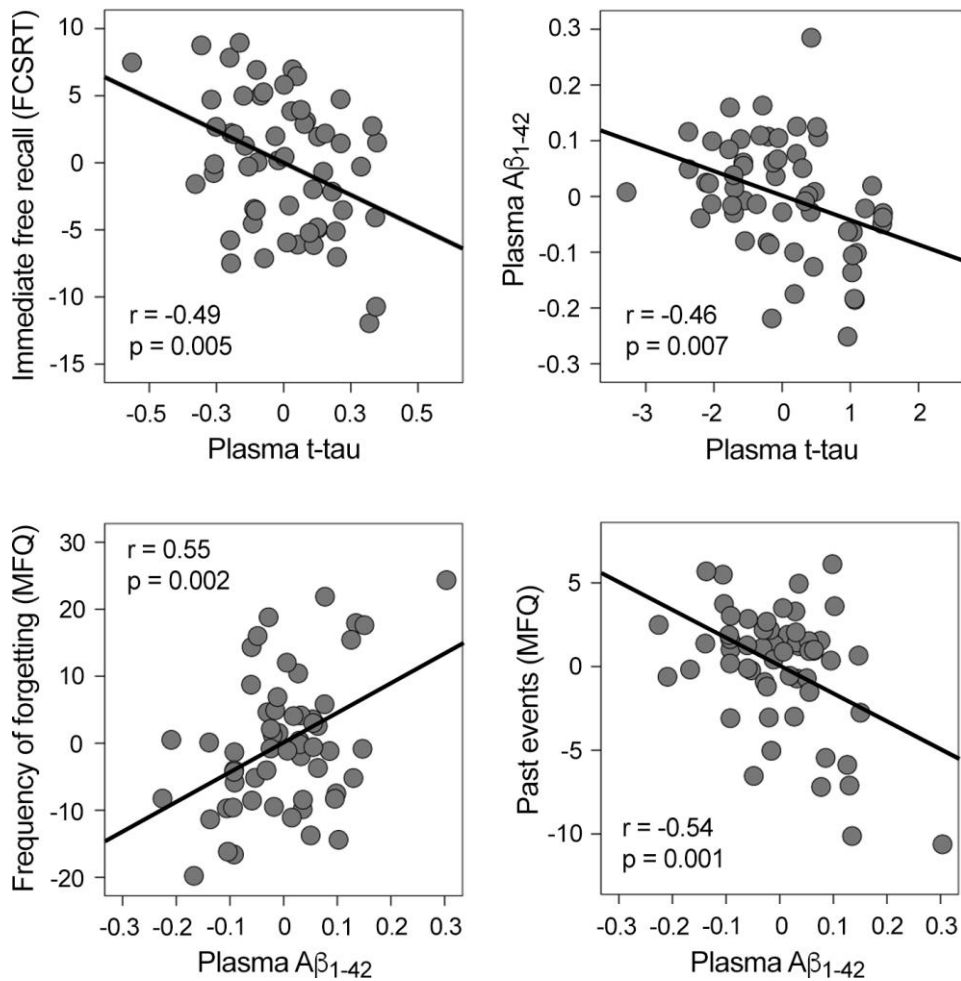

**Figure 1. Significant correlations between plasma t-tau, plasma Aβ<sub>1-42</sub>, and memory performance.** Variables included in the scatter plots correspond to the standardized residuals obtained from linear regression analyses. FCSRT: Free and Cued Selective Reminding Test; MFQ: Memory Functioning Questionnaire.

investigated whether t-tau or A $\beta$  levels were related to variations in cortical thickness and/or cortical FDG uptake. We showed robust associations between either increased plasma t-tau or A $\beta_{1-42}$  and lower glucose uptake, although they both differed in cortical extension and regions affected (Figure 2, Table 2). T-tau-FDG associations spread over the entire neocortex, showing strongest correlations over posterior cingulate (left: p =

$10^{-6}$ ; right: p =  $10^{-7}$ ), while A $\beta_{1-42}$ -FDG correlations were limited to superior parietal (left: p =  $10^{-4}$ ), superior frontal (left: p =  $10^{-3}$ ; right: p =  $10^{-5}$ ), superior temporal (left: p =  $10^{-4}$ ), lateral orbitofrontal (right: p =  $10^{-4}$ ), and posterior cingulate (right: p =  $10^{-5}$ ). We did not find significant associations between plasma A $\beta_{1-40}$  and cortical FDG or between either increased t-tau or A $\beta_{1-42}$  and higher cortical FDG uptake.

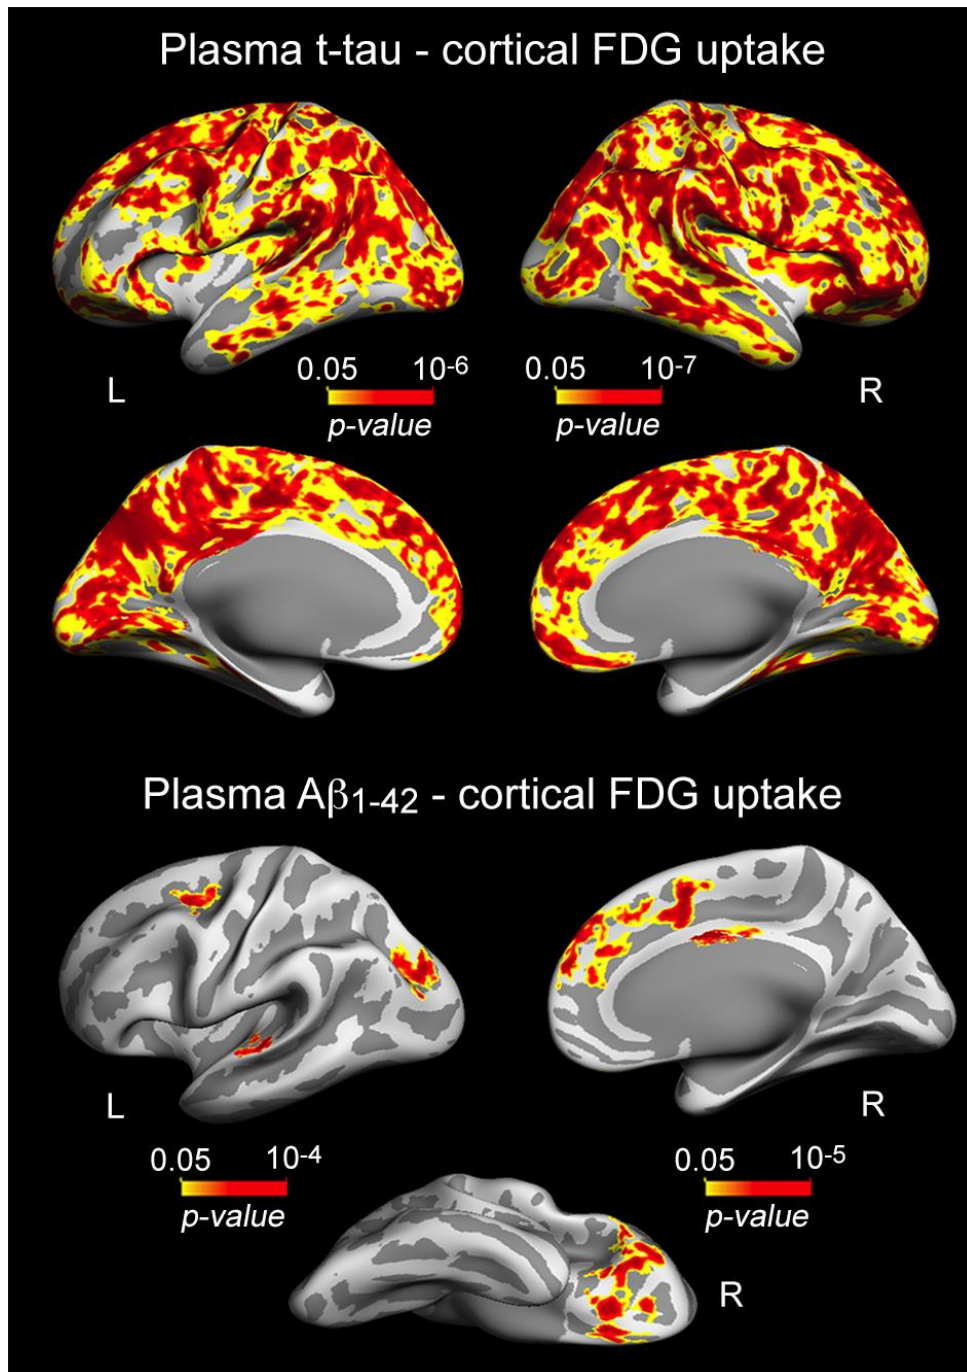

**Figure 2. Significant associations between increased plasma t-tau/A $\beta_{1-42}$  and lower cortical FDG uptake.** Results are represented on inflated cortical surfaces. Left (L) and right (R). The color scale bar illustrates the range of significant p-values.

**Table 2. Correlations between increased plasma levels of t-tau/A $\beta_{1-42}$  and decreased cortical FDG uptake.**

| Cortical region         | CS (mm <sup>2</sup> ) | r    | p                |
|-------------------------|-----------------------|------|------------------|
| t-tau                   |                       |      |                  |
| L posterior cingulate   | 54592                 | 0.62 | 10 <sup>-6</sup> |
| L superior temporal     | 119                   | 0.32 | 10 <sup>-2</sup> |
| R posterior cingulate   | 60700                 | 0.61 | 10 <sup>-7</sup> |
| R inferior temporal     | 175                   | 0.35 | 10 <sup>-3</sup> |
| A $\beta_{1-42}$        |                       |      |                  |
| L superior parietal     | 756                   | 0.49 | 10 <sup>-4</sup> |
| L superior frontal      | 304                   | 0.46 | 10 <sup>-3</sup> |
| L superior temporal     | 232                   | 0.51 | 10 <sup>-4</sup> |
| R lateral orbitofrontal | 1896                  | 0.56 | 10 <sup>-4</sup> |
| R superior frontal      | 1612                  | 0.57 | 10 <sup>-5</sup> |
| R posterior cingulate   | 205                   | 0.66 | 10 <sup>-5</sup> |

CS: cluster size; it refers to the extent of significant correlations between plasma t-tau/A $\beta_{1-42}$  and cortical FDG uptake. Left (L) and right (R) cortical hemisphere. r: Pearson correlation coefficient; p: exact p-value (corrected for multiple comparisons).

As neuronal loss is relatively limited in normal aging [49, 50], it is reasonable to assume that correlations between plasma t-tau and cortical thickness should affect cortical regions particularly vulnerable to aging rather than widespread cortical networks. Accordingly, we showed that increased t-tau was associated with thinning of local aspects of the temporal lobe bilaterally ( $10^{-5} < p < 10^{-4}$ ) (Figure 3, Table 3). Significant correlations between plasma A $\beta$  and cortical thickness were A $\beta$  peptide-dependent. While increased A $\beta_{1-40}$  was significantly associated with thinning of different aspects of the left temporal lobe ( $10^{-5} < p < 10^{-4}$ ), higher A $\beta_{1-42}$  was related to thinning of the left temporal pole ( $p = 10^{-4}$ ) and right lateral occipital cortex ( $p = 10^{-5}$ ) (Figure 3, Table 3).

#### **Relationship between plasma t-tau, cortical glucose metabolism, cortical thickness and memory in aging**

Based on previous evidence linking tau-associated neural dysfunctions to brain atrophy and worse memory in normal aging [48], we hypothesized that patterns of cortical thinning/decreased cortical FDG uptake related to plasma tau/A $\beta$  species would also be associated with lower memory performance in cognitively normal older individuals. Results showed that correlations were limited to the left inferior temporal gyrus ( $p = 10^{-4}$ ) for cortical thinning, and spread over the right superior temporal ( $p = 10^{-5}$ ), and bilaterally over lateral orbitofrontal (left,  $p = 10^{-5}$ ; right,  $p = 10^{-5}$ ) and cingulate cortices (left,  $p = 10^{-3}$ ; right,  $p = 10^{-4}$ ) for cortical hypometabolism (Figure 4, Table 4).

As synaptic dysfunctions caused by tau oligomers are thought to precede neuronal loss in AD models [8], and decreased cerebral glucose metabolism relates to reduced synaptic activity [20, 21], we hypothesized that the association between t-tau-related cortical thinning and memory loss would be mediated, at least partially, by t-tau, cortical FDG uptake and/or by the serial relationship between t-tau and cortical FDG uptake. To formally test this hypothesis, we performed single and serial mediation analyses. None of the single-mediator analyses showed significant indirect effects. On the contrary, the serial mediation model revealed a significant four-path indirect effect when FDG consumption in the left orbitofrontal cortex was introduced as second mediator (Figure 5). This model showed a significant total effect of inferior temporal atrophy on memory ( $\beta = 7.45$ ,  $CI_{95\%} = [1.84\ 13.05]$ ). As expected, inferior temporal atrophy was associated with increased t-tau ( $\beta = -0.32$ ,  $CI_{95\%} = [-0.54\ -0.10]$ ), t-tau was negatively correlated with FDG uptake in the left orbitofrontal cortex after adjusting by inferior temporal thickness ( $\beta = -0.27$ ,  $CI_{95\%} = [-0.40\ -0.13]$ ), and decreased left orbitofrontal FDG uptake was associated with worse memory after controlling for the effects of inferior temporal thickness and t-tau ( $\beta = 26.03$ ,  $CI_{95\%} = [7.21\ 44.85]$ ). According to our hypothesis, the four-path indirect effect was statistically significant ( $\beta = 2.21$ ,  $CI_{95\%} = [0.45\ 6.35]$ ), differed from the indirect effect due to t-tau ( $\beta = -3.37$ ,  $CI_{95\%} = [-10.43\ -0.21]$ ), and showed a significant size effect ( $P_M [CI_{95\%}] = 0.30 [0.05\ 1.70]$ ). However, the mediation was not complete because the direct effect, although lower than the total

effect, remained significant ( $\beta = 6.64$ ,  $CI_{95\%} = [0.89, 12.39]$ ), suggesting that other mediators could partially explain the association between inferior temporal atrophy and worse memory in normal aging. The serial

mediation effect was limited to decreased FDG uptake in the left orbitofrontal cortex. Alternative models modifying the order of the independent variable and mediators did not reveal significant indirect effects.

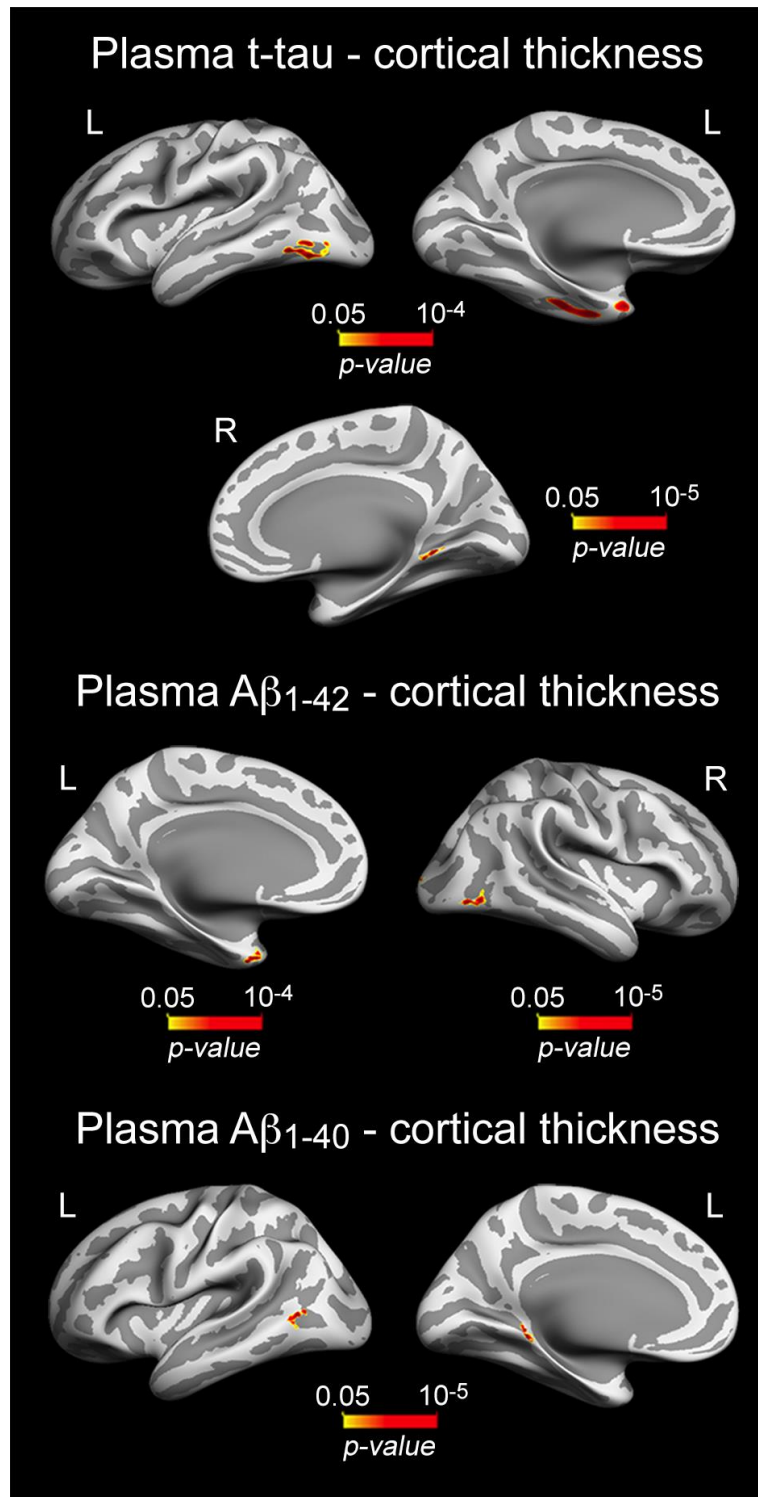

**Figure 3. Significant associations between increased plasma t-tau/ $A\beta_{1-40}$ / $A\beta_{1-42}$  and patterns of cortical thinning.** Results are represented on inflated cortical surfaces. Left (L) and right (R). The color scale bar illustrates the range of significant p-values.

**Table 3. Correlations between increased plasma levels of t-tau/A $\beta$  species and patterns of cortical thinning.**

| Cortical region           | CS (mm <sup>2</sup> ) | r    | p                |
|---------------------------|-----------------------|------|------------------|
| t-tau                     |                       |      |                  |
| L inferior temporal       | 410                   | 0.52 | 10 <sup>-4</sup> |
| L fusiform gyrus          | 336                   | 0.45 | 10 <sup>-4</sup> |
| L temporal pole           | 123                   | 0.36 | 10 <sup>-4</sup> |
| R lingual gyrus           | 85                    | 0.49 | 10 <sup>-5</sup> |
| A $\beta$ <sub>1-40</sub> |                       |      |                  |
| L middle temporal         | 133                   | 0.56 | 10 <sup>-5</sup> |
| L parahippocampal         | 59                    | 0.47 | 10 <sup>-4</sup> |
| A $\beta$ <sub>1-42</sub> |                       |      |                  |
| L temporal pole           | 115                   | 0.5  | 10 <sup>-4</sup> |
| L parahippocampal         | 59                    | 0.47 | 10 <sup>-4</sup> |
| R lateral occipital       | 176                   | 0.6  | 10 <sup>-5</sup> |

CS: cluster size; it refers to the extent of significant correlations between plasma markers and cortical FDG uptake. Left (L) and right (R) cortical hemisphere. r: Pearson correlation coefficient; p: exact p-value (corrected for multiple comparisons).

## DISCUSSION

This study sought to determine the potential of plasma t-tau for detecting cerebral vulnerability in aging. Results revealed that increased concentration of plasma t-tau was associated with widespread reduction of cortical glucose uptake, thinning of the temporal lobe, and memory deficits. In particular, the generalized tau-related decrease of cortical glucose consumption emerged as a determining factor of the relationship between cortical thinning and memory loss. Moreover, plasma t-tau-related deficits in brain and cognition markedly differed from those associated with plasma A $\beta$ . Overall, these results support the view that plasma t-tau is able to track subclinical cerebral and memory deficits in normal aging, which may serve for detecting incipient neuronal damage in primary care settings, facilitating the enrollment of high-risk individuals into dementia prevention trials.

### Higher plasma t-tau is associated with memory deficits in aging

Evidence linking AD biomarkers to cognitive function in normal aging has mostly focused on A $\beta$  pathology. Despite considerable heterogeneity of results, the association between amyloid burden and poor cognition is supported by both cross-sectional [51–53] and longitudinal studies [51, 54, 55]. Studies focused on the relationship between tau and cognition in normal aging have revealed a close link between tau pathology and lower episodic memory [56–59] and pattern-separation

abilities [48], both functions governed by structures of the medial temporal lobe. These findings are consistent with evidence showing a relationship between tau deposition in the temporal lobe and hippocampal disconnection, which in turn is associated with worse episodic memory performance in normal aging [60]. The question arises as to whether plasma A $\beta$  or tau measurements are also able to explain subclinical cognitive deficits in nondemented elderly subjects.

To our knowledge, this study represents the first evidence of association between plasma t-tau and cognitive aging. Previous research has revealed that higher plasma t-tau was correlated with worse memory performance in MCI/AD patients in cross-sectional [33, 35] and longitudinal studies [29, 61, 62]. Although the controversy still exists over whether neurofibrillary tangles or A $\beta$  plaques are the first event in AD, evidence suggests that CSF A $\beta$ <sub>1-42</sub> may be the first biomarker to change in the progression to AD followed by tau pathology [63, 64], supporting associations between increased plasma A $\beta$ <sub>1-42</sub> and worse subjective memory that precede tau-related objective memory changes in normal aging. Accordingly, the late-life accumulation of A $\beta$  and tau in plasma may serve to monitor cognitive decline in normal aging, paving the way to clinical trials focused on evaluating the efficacy of anti-A $\beta$  and tau interventions to prevent cognitive decline in preclinical AD.

We further showed that increased t-tau was associated with worse memory performance whereas higher A $\beta$ <sub>1-42</sub>

was related to more self-reported memory complaints, suggesting that plasma concentration of both AD-related proteins uncover different aspects of memory deterioration in aging. Accumulated evidence suggests that subjective memory complaints, in the absence of cognitive impairment, increase the dementia risk in the general population [65–68] and are related to cerebral deficits [69–72]. Importantly, recent findings have shown that  $A\beta_{1-42}$  were associated with t-tau levels, suggesting that elevated  $A\beta_{1-42}$  combined with subjective memory complaints may signal an increased risk for developing AD [73]. Previous studies have shown that elevated plasma  $A\beta_{1-42}$  at baseline and decreasing levels over time predicts conversion to AD [74, 75], supporting the hypothesis that plasma  $A\beta_{1-42}$  fluctuations might signal earlier neurologic changes that

may eventually culminate in dementia. In line with this hypothesis, our findings suggest that increased plasma  $A\beta_{1-42}$  may reflect higher cerebral vulnerability in aging, as revealed by its association with self-reported memory complaints, regional cortical thinning and reduced cortical glucose uptake.

Evidence suggests that  $A\beta_{1-40}$  has preference for cardiovascular aging while  $A\beta_{1-42}$  is mainly involved in development of AD [76], presumably explaining the lack of association between plasma  $A\beta_{1-40}$  and t-tau reported in the present study. Accordingly,  $A\beta_{1-40}$  is selectively deposited in leptomeningeal blood vessels in contrast to  $A\beta_{1-42}$  that is mostly found in senile plaques [77]. Moreover, studies assessing the association of plasma  $A\beta_{1-40}$  with cognitive function have not yielded

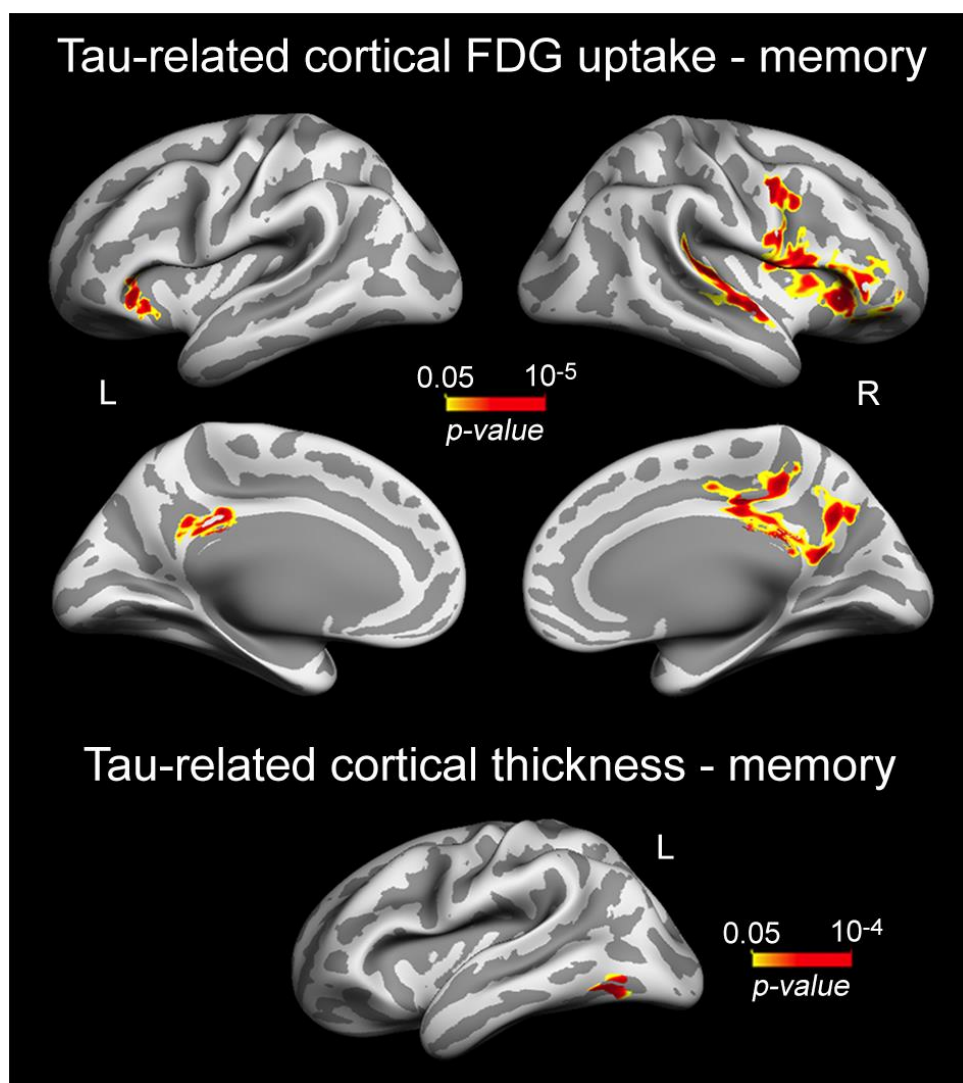

**Figure 4. Significant associations between plasma t-tau-related reductions of cortical FDG uptake/cortical thinning and memory performance.** Results are represented on inflated cortical surfaces. Left (L) and right (R). The color scale bar illustrates the range of significant p-values.



**Table 4. Correlations between plasma t-tau related cortical changes and memory deficits.**

| Cortical region                 | CS (mm <sup>2</sup> ) | r    | p                |
|---------------------------------|-----------------------|------|------------------|
| t-tau (cortical thinning)       |                       |      |                  |
| L inferior temporal             | 297                   | 0.46 | 10 <sup>-4</sup> |
| t-tau (cortical hypometabolism) |                       |      |                  |
| L lateral orbitofrontal         | 460                   | 0.52 | 10 <sup>-5</sup> |
| L posterior cingulate           | 277                   | 0.43 | 10 <sup>-3</sup> |
| R lateral orbitofrontal         | 3971                  | 0.49 | 10 <sup>-5</sup> |
| R posterior cingulate           | 15731                 | 0.48 | 10 <sup>-4</sup> |
| R superior temporal             | 1076                  | 0.47 | 10 <sup>-5</sup> |

CS: cluster size; it refers to the extent of significant correlations between t-tau related cortical changes and immediate free recall (FCSRT). Left (L) and right (R) cortical hemisphere. r: Pearson correlation coefficient; p: exact p-value (corrected for multiple comparisons).

consistent results [78], suggesting that aging-related cognitive deficits are mainly reflected in plasma t-tau and Aβ<sub>1-42</sub> rather than in Aβ<sub>1-40</sub>.

**Higher plasma t-tau is associated with cortical deficits in aging**

The present study revealed that higher plasma t-tau was associated with a global reduction of cortical FDG uptake. The association with cortical hypometabolism was more noticeable for plasma t-tau than for Aβ<sub>1-42</sub>, suggesting that plasma t-tau is a better biomarker of aging-related synaptic reduction than Aβ<sub>1-42</sub>.

Interestingly, we further found that tau-related FDG reduction over right prefrontal cortex and bilateral posterior cingulate was associated with subclinical memory loss. While there is evidence linking increased plasma t-tau to hypometabolism in MCI [79] and AD patients [29], associations between tau-related cortical hypometabolism and aging-related memory deficits have not been thoroughly investigated. Our observations are consistent with recent evidence showing that tau-PET binding was associated with lower FDG uptake over posterior cingulate that, in turn, correlated with aging-related memory decline [25]. Mechanistically, tau-related associations with

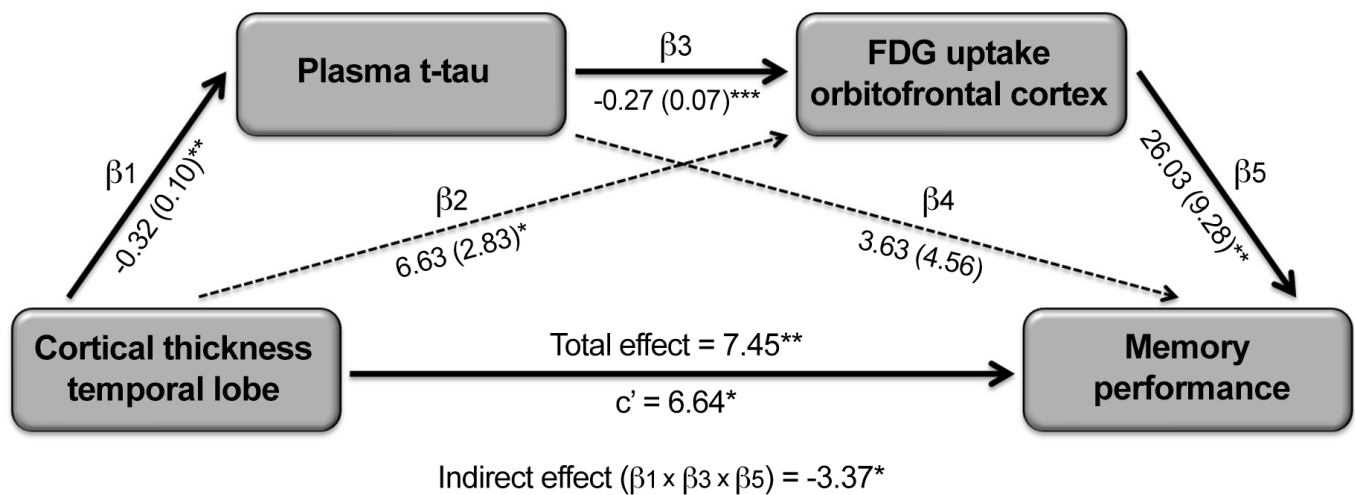

**Figure 5. Serial mediating role of plasma t-tau and cortical FDG uptake on the relationship between cortical thinning and memory deficits in aging.** Path analysis showing the serial mediation of higher plasma t-tau and lower FDG uptake in the orbitofrontal cortex on the relationship between cortical thinning in the temporal lobe and memory deficits. Numbers along paths are unstandardized regression coefficients with the standard deviation in parenthesis. Asterisks indicate that the direct path as well as the total and indirect effect were statistically significant (\*p < 0.05; \*\*p < 0.005; \*\*\*p < 0.001). Thicker lines refer to the paths intervening in the three-way indirect effect.

hypometabolism of posterior cingulate may be driven by the vulnerability of this region to A $\beta$  burden [80] and/or by the selective reduction of the mitochondrial enzyme cytochrome oxidase in this region [81], likely featuring the earliest sign of energy hypometabolism in AD.

Previous research has shown that higher plasma t-tau is associated with cortical atrophy in MCI/AD patients [30, 35]. Our study extends these findings by linking increased plasma t-tau to patterns of cortical thinning in normal aging. We showed that tau-related patterns of cortical thinning were restricted to small patches of the temporal lobe critically affected in predementia stages, as the inferior temporal cortex [82], fusiform gyrus [83], lingual gyrus [84], and the temporal pole [85]. Interestingly, most associations between plasma t-tau or A $\beta$  species were restricted to temporal cortices, reinforcing the view that circulating blood levels of both AD proteins are able to track the structural integrity of temporal lobes in aging [70]. Contrary to our results, recent research has revealed no significant association between plasma t-tau and volume/thickness of different cortical regions in a cohort of cognitively normal adults [86]. Different methodological aspects may contribute to account for discrepancies between these studies. First, samples of both studies are markedly different. Chiu and collaborators [86] examined cognitively normal middle-aged and older adults (age range: 45-95 yrs.), whereas the present study was focused on late life (62-78 yrs.). Second, our MRI analysis protocol included manual correction of misclassified cerebral tissues, which probably enhanced the reliability of cortical thickness measurements. Third, cortical thickness maps were smoothed using non-linear spherical wavelet-based de-noising schemes, which have previously shown greater specificity and sensitivity than Gaussian spatial filters for detecting local changes in cortical thickness [43]. Fourth, both studies employed different approaches to analyze cortical thickness. While we applied surface-based vertex-wise analysis, Chiu et al. [86] used ROI analysis in their study. Finally, ultra-sensitivity assays used for determining plasma t-tau also differed between the two studies. We used single molecule array (SIMOA)-based assays that rely on two epitopes and two antibodies (one for binding and other for tau detection), whereas Chiu et al.'s study [86] employed immunomagnetic reduction-superconducting quantum interference technology based on one antibody against one epitope for tau detection.

Our findings of association between increased plasma t-tau and metabolic/structural cortical changes support the idea that tau protein leaks from brain to bloodstream, revealing key aspects of the neuronal environment. The integrity of the dural lymphatic system, likely assisted

by the water channel aquaporin 4 [87], seems to play a key role in clearance of extracellular tau and A $\beta$  [88], as well as the importance of the BBB and endothelial function in the movement of tau from brain to blood [89], and possible effects of cardiovascular risk factors, trauma, or cerebrovascular pathology in AD development [90]. Emerging evidence supports a bidirectional relationship between brain extracellular tau and plasma tau. In this vein, administration of an anti-tau antibody to tau transgenic mice and patients with progressive supranuclear palsy, a tau-related neurodegenerative disorder, resulted in a dose-dependent increase in plasma tau that was bound to antibody, and correlated with the concentration of extracellular and soluble tau in the brain [38, 91]. Previous studies have also shown that lowering plasma tau levels via peritoneal dialysis reduces interstitial fluid tau levels in the brain [92], suggesting that enhancement of plasma tau clearance may be a potential therapeutic strategy for tauopathies. A better understanding of reciprocal influences between brain extracellular tau and plasma tau appears to be critical to monitor the efficacy of anti-tau antibody therapy in elderly subjects at risk for developing AD.

### **The association between plasma t-tau and cortical hypometabolism mediates the relationship between cortical thinning and memory deficits in aging**

Associations between cerebral tau load and memory are well documented in both normal aging [57] and AD [93]. However, whether this relationship is biologically plausible with plasma t-tau, and whether it is indirectly mediated by other factors in late life are unexplored questions. Our study revealed that causal relationships between cortical atrophy and memory deficits in aging are more complex than previously thought. We showed that increased plasma t-tau and lower glucose uptake in the orbitofrontal cortex was a determining factor of the association between t-tau-related cortical atrophy and memory deficits, suggesting that plasma t-tau and metabolism of the orbitofrontal cortex may play a critical role in monitoring aging-related memory decline. These results are supported by previous evidence showing that higher CSF tau concentrations predict lower cerebral glucose metabolism, and that FDG hypometabolism acts as a mediator between CSF tau and cognitive impairment in MCI/AD [94]. Our results further highlighted that the causal sequence of events leading to cognitive deficits may differ from normal aging to AD. Whereas cortical atrophy has been suggested to act as a mediator in the relationship between tau and cognition in AD patients [95], we showed that the association between plasma t-tau and cortical hypometabolism determined the relationship between cortical loss and memory deficits in normal aging. Further research is needed to elucidate the complementary role of different tau measurements on

cognitive decline in aging and different AD stages, and to determine to what extent this role may eventually change with disease.

Compared to other studies [29–33, 35, 37, 61, 62, 79, 86], we have provided converging evidence from structural MRI, FDG-PET, cognitive performance, and mediation analysis, supporting that plasma t-tau is able to identify subclinical cerebral and cognitive deficits in normal aging. To our knowledge, this is also the first study to compare aging-related associations between structural/metabolic brain changes and plasma t-tau and A $\beta$  species. In summary, plasma t-tau levels were associated with widespread reductions of cortical glucose uptake, patterns of cortical thinning affecting the temporal lobe, and subclinical memory deficits in cognitively normal elderly subjects. Importantly, plasma t-tau-related deficits in brain and cognition markedly differed from those associated with plasma A $\beta$ . Moreover, tau-related reductions of glucose consumption in the orbitofrontal cortex appeared as a determining factor of the relationship between cortical thinning and memory loss.

## MATERIALS AND METHODS

### Participants

Fifty-seven cognitively normal elderly subjects, recruited from senior citizen's associations, health-screening programs, and hospital outpatient services, were enrolled in the study. All participants were volunteers from different aging/AD research programs conducted in the Laboratory of Functional Neuroscience at Pablo de Olavide University (Seville, Spain). They showed normal cognitive performance in the neuropsychological tests relative to appropriate reference values for age and education level, and no medical illnesses or medications that affected cognition. All individuals showed a global score of 0 (no dementia) in the Clinical Dementia Rating (CDR), normal global cognitive status in the Mini Mental State Examination (MMSE) (scores  $\geq 26$ ), and normal independent function –assessed by the Spanish version of the Interview for Deterioration in Daily Living Activities [39]. Depression was excluded (scores  $\leq 10$ ) by the Geriatric Depression Scale [40]. All participants gave informed consent to the experimental protocol approved by the Ethical Committee for Human Research at the University Pablo de Olavide according to the principles outlined in the Declaration of Helsinki.

### Neuropsychological assessment

A neuropsychological battery covering memory, executive functioning, and processing speed was

administered to all participants. Subjective memory complaints were evaluated with the Memory Functioning Questionnaire (MFQ) [41], while objective memory was assessed with the Free and Cued Selective Reminding Test (FCSRT). The Tower of London (TOL) and the processing speed index (PSI) from the Wechsler Adult Intelligence Scale-III (WAIS-III) were administered to evaluate executive function and processing speed, respectively.

### Plasma total tau and A $\beta$

Fasting blood samples were taken at 9:00–10:00 in all participants to control for potential circadian effects. Briefly, venous blood samples were collected in 10 ml K2-ethylenediaminetetraacetic acid (EDTA) coated tubes (BD Diagnostics), and immediately centrifuged (1989 g) at 4°C for 5 min. Supernatant plasma was aliquoted into polypropylene tubes containing 250  $\mu$ l of plasma mixed with 8.32  $\mu$ l of a protease inhibitor cocktail (cOmplete Ultra Tablets mini, Roche), and stored at -80°C until analysis. Plasma samples used in the present study were not previously thawed.

Plasma t-tau was measured with the SIMOA Tau 2.0 kit on the Simoa HD-1 analyzer (Quanterix Corporation, MA), following the manufacturer's instructions. This method is based on digital array technology that measures t-tau in plasma or serum with a detection limit of 0.019 pg/ml. The assay utilizes a capture mouse monoclonal antibody that binds to an epitope in the mid-domain of tau and a detection mouse monoclonal antibody that binds to an epitope in the N-terminal region of the protein. This combination of antibodies reacts with both normal and phosphorylated tau, presumably measuring all forms of tau. All assays were run at 21°C room temperature, in duplicate, and the average of the two measurements (pg/ml) was used for statistical analyses. Samples showing coefficients of variation higher than 20% were re-analyzed or excluded.

Plasma A $\beta$  level was determined with a double-antibody sandwich ELISA (human A $\beta$ <sub>1-40</sub> and high sensitive A $\beta$ <sub>1-42</sub>, Wako Chemicals, Tokyo, Japan). Samples and standards were incubated overnight at 8°C with antibodies specific for A $\beta$ <sub>1-40</sub> or A $\beta$ <sub>1-42</sub> peptides, and the wells were read for absorption at 450 nm on a Victor 3 system (PerkinElmer, Waltham, MA), following the manufacturer's instructions. Plasma A $\beta$  level was measured in duplicate (50  $\mu$ l), and the average of the two measurements (pg/ml) was used for statistical analysis. Both inter-assay and intra-assay coefficients of variation were kept below 10%. The detection limit for these assays was 1.04 pg/ml for A $\beta$ <sub>1-40</sub> and 0.54 pg/ml for A $\beta$ <sub>1-42</sub>.

## MRI and FDG-PET acquisition

Structural brain images were acquired on a Philips Achieva 3T MRI scanner equipped with an 8-channel phased-array head coil (Philips, Best, Netherlands). A whole-brain T1-weighted magnetization prepared rapid gradient echo (MPRAGE) was acquired with the following parameters: sagittal slice orientation, repetition time (TR)=2300 ms, echo time (TE)=4.5 ms, matrix = 320 × 320, flip angle = 8°, voxel resolution = 0.8 mm<sup>3</sup> isotropic, no gap between slices, acquisition time = 9.1 min. Head motion was minimized by using a head restraint system and placing foam padding around the subject's head. Participants were provided with headphones and foam earplugs to attenuate scanner noise.

FDG-PET brain images were acquired on a whole-body PET-CT Siemens Biograph 16 HiREZ scanner (Siemens Medical Systems, Germany) in 3D mode. Subjects fasted for at least 8 h before PET examination, and they were scanned at the same time of the day (8:00-9:00 am). Participants were injected with 370 MBq of FDG in a quiet, dimly-lit room. FDG-PET images were acquired in static mode 30 min after injection with scan duration of 10 min. FDG brain scans were corrected for attenuation, scatter and decay, smoothed, and reconstructed with 2.6 x 2.6 x 2 mm voxel resolution using back-projection filters.

## Estimation of surface-based cortical thickness and cortical glucose uptake

MRI data were processed using the analysis pipeline of Freesurfer v6.0 (<https://surfer.nmr.mgh.harvard.edu/>) that involves intensity normalization, registration to Talairach, skull stripping, white matter (WM) segmentation, tessellation of WM boundaries, and automatic correction of topological defects [42]. Pial surface misplacements and erroneous WM segmentation were manually corrected on a slice-by-slice basis to enhance the reliability of cortical thickness measurements. Individual cortical thickness maps were smoothed using non-linear spherical wavelet-based denoising schemes, which have previously shown greater specificity and sensitivity for detecting local and global changes in cortical thickness [43].

Partial volume correction (PVC) of FDG-PET brain images was performed with the PMOD software v3.208 (PMOD Technologies Ltd., Switzerland) using the Müller-Gartner approach, and assuming a uniform 6 mm point spread function. To map PET scans onto individual cortical surfaces, FDG images were first co-registered to T1 scans. Next, PVC-cortical FDG images were transformed into standardized uptake value ratios

(SUVr) using the gray matter of cerebellum (obtained with Freesurfer) as reference region. Next, resulting PVC-FDG cortical-to-cerebellum SUVr images were mapped into individual cortical surfaces with Freesurfer, and further smoothed with non-linear spherical wavelet-based de-noising schemes [43].

## Statistical analyses

We first assessed whether plasma t-tau, plasma A $\beta$  species, and cognitive scores (FCSRT, TOL, PSI) deviated from normality using the Kolmogorov-Smirnov test with the Lilliefors correction. As the distribution of plasma t-tau was skewed, a log (base 10) transformation was applied prior to analysis. Next, regression analyses were conducted to evaluate whether plasma t-tau was associated with cognitive performance, adjusting by age, sex, A $\beta$ <sub>1-40</sub> and A $\beta$ <sub>1-42</sub>. To avoid bias assessing the relationship between plasma t-tau and plasma A $\beta$  (either A $\beta$ <sub>1-40</sub> or A $\beta$ <sub>1-42</sub>), the alternative A $\beta$  peptide was included as a confounding variable together with age and sex. These analyses were performed with R v3.0.1 (The R Foundation for Statistical Computing).

Vertex-wise regression analyses were further performed to examine associations between plasma t-tau and variations in cortical thickness/cortical FDG uptake. These analyses were also adjusted by age, sex, A $\beta$ <sub>1-40</sub> and A $\beta$ <sub>1-42</sub>. Results were corrected for multiple comparisons using a previously validated hierarchical statistical model [44]. This procedure first controls the family-wise error rate in significant clusters by applying random field theory over smoothed statistical maps; and next controls the false discovery rate in vertices within significant clusters over unsmoothed statistical maps. A significant cluster was defined as a contiguous set of cortical surface vertices ( $\geq 90$ ) that met the statistical threshold criteria ( $p < 0.05$  after correction for multiple comparisons). Further regression analyses were carried out using plasma A $\beta$  as predictor (either A $\beta$ <sub>1-40</sub> or A $\beta$ <sub>1-42</sub>), adjusted by age, sex, t-tau, and the alternative A $\beta$  peptide. These analyses were performed with Freesurfer v6.0.

We next performed vertex-wise regression analysis to investigate whether tau-related changes in cortical thickness/cortical FDG uptake were associated with tau-related changes in cognition. To examine potential indirect relationships between plasma t-tau, cortical thickness, cortical glucose metabolism and cognition, we performed single and serial mediation analyses adjusted by age, sex, A $\beta$ <sub>1-40</sub> and A $\beta$ <sub>1-42</sub>, using the “lavaan” package in R. Inference was determined by 95% bias-corrected bootstrap confidence intervals from 10,000 bootstrap samples, and the ratio of the indirect

effect to the total effect ( $P_M$ ) was used as a measure of the effect size [45].

## AUTHOR CONTRIBUTIONS

JLC designed this study and wrote the manuscript. JLC and MA contributed to data acquisition, analysis, and preparation of tables and figures. JRC and SF performed the plasma tau experiments. TW and RSO revised the manuscript. All authors critically reviewed and approved the submitted manuscript.

## CONFLICTS OF INTEREST

The authors declare that they have no conflicts of interest.

## FUNDING

This work was supported by research grants from the Spanish Ministry of Economy and Competitiveness (SAF2017-85310-R to JLC, PSI2017-85311-P to MA); the International Center on Aging CENIE-POCTEP (0348\_CIE\_6\_E to MA); CIBERNED (CB06/05/1111 to JLC); and the NIH/NIA/NHLBI (P30AG008051 to TW; R01AG056031 and R01AG056531 to RSO).

## REFERENCES

1. Goedert M, Spillantini MG, Jakes R, Rutherford D, Crowther RA. Multiple isoforms of human microtubule-associated protein tau: sequences and localization in neurofibrillary tangles of Alzheimer's disease. *Neuron*. 1989; 3:519–26.  
[https://doi.org/10.1016/0896-6273\(89\)90210-9](https://doi.org/10.1016/0896-6273(89)90210-9)  
PMID:2484340
2. Binder LI, Frankfurter A, Rebhun LI. The distribution of tau in the mammalian central nervous system. *J Cell Biol*. 1985; 101:1371–78.  
<https://doi.org/10.1083/jcb.101.4.1371> PMID:3930508
3. Weingarten MD, Lockwood AH, Hwo SY, Kirschner MW. A protein factor essential for microtubule assembly. *Proc Natl Acad Sci USA*. 1975; 72:1858–62.  
<https://doi.org/10.1073/pnas.72.5.1858>  
PMID:1057175
4. Drubin DG, Kirschner MW. Tau protein function in living cells. *J Cell Biol*. 1986; 103:2739–46.  
<https://doi.org/10.1083/jcb.103.6.2739>  
PMID:3098742
5. Avila J, Lucas JJ, Perez M, Hernandez F. Role of tau protein in both physiological and pathological conditions. *Physiol Rev*. 2004; 84:361–84.  
<https://doi.org/10.1152/physrev.00024.2003>  
PMID:15044677
6. Grundke-Iqbal I, Iqbal K, Tung YC, Quinlan M, Wisniewski HM, Binder LI. Abnormal phosphorylation of the microtubule-associated protein tau (tau) in Alzheimer cytoskeletal pathology. *Proc Natl Acad Sci USA*. 1986; 83:4913–17.  
<https://doi.org/10.1073/pnas.83.13.4913>  
PMID:3088567
7. Kopeikina KJ, Hyman BT, Spires-Jones TL. Soluble forms of tau are toxic in Alzheimer's disease. *Transl Neurosci*. 2012; 3:223–33.  
<https://doi.org/10.2478/s13380-012-0032-y>  
PMID:23029602
8. Lasagna-Reeves CA, Castillo-Carranza DL, Sengupta U, Clos AL, Jackson GR, Kaye R. Tau oligomers impair memory and induce synaptic and mitochondrial dysfunction in wild-type mice. *Mol Neurodegener*. 2011; 6:39.  
<https://doi.org/10.1186/1750-1326-6-39>  
PMID:21645391
9. Florenzano F, Veronica C, Ciasca G, Ciotti MT, Pittaluga A, Olivero G, Feligioni M, Iannuzzi F, Latina V, Maria Sciacca MF, Sinopoli A, Milardi D, Pappalardo G, et al. Extracellular truncated tau causes early presynaptic dysfunction associated with Alzheimer's disease and other tauopathies. *Oncotarget*. 2017; 8:64745–78.  
<https://doi.org/10.18632/oncotarget.17371>  
PMID:29029390
10. Hill E, Karikari TK, Moffat KG, Richardson MJ, Wall MJ. Introduction of tau oligomers into cortical neurons alters action potential dynamics and disrupts synaptic transmission and plasticity. *eNeuro*. 2019; 6.  
<https://doi.org/10.1523/ENEURO.0166-19.2019>  
PMID:31554666
11. Lasagna-Reeves CA, Castillo-Carranza DL, Sengupta U, Guerrero-Munoz MJ, Kiritoshi T, Neugebauer V, Jackson GR, Kaye R. Alzheimer brain-derived tau oligomers propagate pathology from endogenous tau. *Sci Rep*. 2012; 2:700.  
<https://doi.org/10.1038/srep00700> PMID:23050084
12. Blennow K, Hampel H. CSF markers for incipient Alzheimer's disease. *Lancet Neurol*. 2003; 2:605–13.  
[https://doi.org/10.1016/s1474-4422\(03\)00530-1](https://doi.org/10.1016/s1474-4422(03)00530-1)  
PMID:14505582
13. Hampel H, Blennow K, Shaw LM, Hoessler YC, Zetterberg H, Trojanowski JQ. Total and phosphorylated tau protein as biological markers of Alzheimer's disease. *Exp Gerontol*. 2010; 45:30–40.  
<https://doi.org/10.1016/j.exger.2009.10.010>  
PMID:19853650
14. Bürger née Buch K, Padberg F, Nolde T, Teipel SJ, Stübner S, Haslinger A, Schwarz MJ, Sunderland T, Arai H, Rapoport SI, Möller HJ, Hampel H. Cerebrospinal

- fluid tau protein shows a better discrimination in young old (<70 years) than in old old patients with Alzheimer's disease compared with controls. *Neurosci Lett*. 1999; 277:21–4.  
[https://doi.org/10.1016/s0304-3940\(99\)00845-9](https://doi.org/10.1016/s0304-3940(99)00845-9)  
PMID:10643888
15. Kester MI, van der Vlies AE, Blankenstein MA, Pijnenburg YA, van Elk EJ, Scheltens P, van der Flier WM. CSF biomarkers predict rate of cognitive decline in Alzheimer disease. *Neurology*. 2009; 73:1353–58.  
<https://doi.org/10.1212/WNL.0b013e3181bd8271>  
PMID:19858456
  16. Sängård K, Zetterberg H, Blennow K, Hansson O, Minthon L, Londo E. Cerebrospinal fluid total tau as a marker of Alzheimer's disease intensity. *Int J Geriatr Psychiatry*. 2010; 25:403–10.  
<https://doi.org/10.1002/gps.2353> PMID:19650161
  17. Degerman Gunnarsson M, Lannfelt L, Ingelsson M, Basun H, Kilander L. High tau levels in cerebrospinal fluid predict rapid decline and increased dementia mortality in Alzheimer's disease. *Dement Geriatr Cogn Disord*. 2014; 37:196–206.  
<https://doi.org/10.1159/000355556> PMID:24157938
  18. Mattsson N, Insel PS, Palmqvist S, Portelius E, Zetterberg H, Weiner M, Blennow K, Hansson O, and Alzheimer's Disease Neuroimaging Initiative. Cerebrospinal fluid tau, neurogranin, and neurofilament light in Alzheimer's disease. *EMBO Mol Med*. 2016; 8:1184–96.  
<https://doi.org/10.15252/emmm.201606540>  
PMID:27534871
  19. Chiaravalloti A, Barbagallo G, Ricci M, Martorana A, Ursini F, Sannino P, Karalis G, Schillaci O. Brain metabolic correlates of CSF tau protein in a large cohort of Alzheimer's disease patients: a CSF and FDG PET study. *Brain Res*. 2018; 1678:116–22.  
<https://doi.org/10.1016/j.brainres.2017.10.016>  
PMID:29066367
  20. Sokoloff L. Relation between physiological function and energy metabolism in the central nervous system. *J Neurochem*. 1977; 29:13–26.  
<https://doi.org/10.1111/j.1471-4159.1977.tb03919.x>  
PMID:407330
  21. Rocher AB, Chapon F, Blaizot X, Baron JC, Chavoix C. Resting-state brain glucose utilization as measured by PET is directly related to regional synaptophysin levels: a study in baboons. *Neuroimage*. 2003; 20:1894–98.  
<https://doi.org/10.1016/j.neuroimage.2003.07.002>  
PMID:14642499
  22. Andriuta D, Moullart V, Schraen S, Devendeville A, Meyer ME, Godefroy O, and Alzheimer's Disease Neuroimaging. What are the most frequently impaired markers of neurodegeneration in ADNI subjects? *J Alzheimers Dis*. 2016; 51:793–800.  
<https://doi.org/10.3233/JAD-150829> PMID:26923012
  23. Bischof GN, Jessen F, Fließbach K, Dronse J, Hammes J, Neumaier B, Onur O, Fink GR, Kukulja J, Drzezga A, van Eimeren T, and Alzheimer's Disease Neuroimaging Initiative. Impact of tau and amyloid burden on glucose metabolism in Alzheimer's disease. *Ann Clin Transl Neurol*. 2016; 3:934–39.  
<https://doi.org/10.1002/acn3.339> PMID:28097205
  24. Jaillard A, Vanhoutte M, Maureille A, Schraen S, Skrobala E, Delbeuck X, Rollin-Sillaire A, Pasquier F, Bombois S, Semah F. The relationship between CSF biomarkers and cerebral metabolism in early-onset Alzheimer's disease. *Eur J Nucl Med Mol Imaging*. 2019; 46:324–33.  
<https://doi.org/10.1007/s00259-018-4113-1>  
PMID:30155553
  25. Hanseeuw BJ, Betensky RA, Schultz AP, Papp KV, Mormino EC, Sepulcre J, Bark JS, Cosio DM, LaPoint M, Chhatwal JP, Rentz DM, Sperling RA, Johnson KA. Fluorodeoxyglucose metabolism associated with tau-amyloid interaction predicts memory decline. *Ann Neurol*. 2017; 81:583–96.  
<https://doi.org/10.1002/ana.24910> PMID:28253546
  26. Adams JN, Lockhart SN, Li L, Jagust WJ. Relationships between tau and glucose metabolism reflect Alzheimer's disease pathology in cognitively normal older adults. *Cereb Cortex*. 2019; 29:1997–2009.  
<https://doi.org/10.1093/cercor/bhy078>  
PMID:29912295
  27. Schöll M, Maass A, Mattsson N, Ashton NJ, Blennow K, Zetterberg H, Jagust W. Biomarkers for tau pathology. *Mol Cell Neurosci*. 2019; 97:18–33.  
<https://doi.org/10.1016/j.mcn.2018.12.001>  
PMID:30529601
  28. Leuzy A, Chiotis K, Lemoine L, Gillberg PG, Almkvist O, Rodriguez-Vieitez E, Nordberg A. Tau PET imaging in neurodegenerative tauopathies-still a challenge. *Mol Psychiatry*. 2019; 24:1112–34.  
<https://doi.org/10.1038/s41380-018-0342-8>  
PMID:30635637
  29. Mattsson N, Zetterberg H, Janelidze S, Insel PS, Andreasson U, Stomrud E, Palmqvist S, Baker D, Tan Hehir CA, Jeromin A, Hanlon D, Song L, Shaw LM, et al, and ADNI Investigators. Plasma tau in Alzheimer disease. *Neurology*. 2016; 87:1827–35.  
<https://doi.org/10.1212/WNL.0000000000003246>  
PMID:27694257
  30. Deters KD, Risacher SL, Kim S, Nho K, West JD, Blennow K, Zetterberg H, Shaw LM, Trojanowski JQ, Weiner MW, Saykin AJ; Alzheimer Disease Neuroimaging

- Initiative. Plasma Tau Association with Brain Atrophy in Mild Cognitive Impairment and Alzheimer's Disease. *J Alzheimers Dis.* 2017; 58:1245–1254.  
<https://doi.org/10.3233/JAD-161114> PMID:[28550246](https://pubmed.ncbi.nlm.nih.gov/28550246/)
31. Mielke MM, Hagen CE, Xu J, Chai X, Vemuri P, Lowe VJ, Airey DC, Knopman DS, Roberts RO, Machulda MM, Jack CR Jr, Petersen RC, Dage JL. Plasma phospho-tau181 increases with Alzheimer's disease clinical severity and is associated with tau- and amyloid-positron emission tomography. *Alzheimers Dement.* 2018; 14:989–97.  
<https://doi.org/10.1016/j.jalz.2018.02.013>  
PMID:[29626426](https://pubmed.ncbi.nlm.nih.gov/29626426/)
32. Fan LY, Tzen KY, Chen YF, Chen TF, Lai YM, Yen RF, Huang YY, Shiue CY, Yang SY, Chiu MJ. The relation between brain amyloid deposition, cortical atrophy, and plasma biomarkers in amnesic mild cognitive impairment and Alzheimer's disease. *Front Aging Neurosci.* 2018; 10:175.  
<https://doi.org/10.3389/fnagi.2018.00175>  
PMID:[29967578](https://pubmed.ncbi.nlm.nih.gov/29967578/)
33. Fossati S, Ramos Cejudo J, Debure L, Pirraglia E, Sone JY, Li Y, Chen J, Butler T, Zetterberg H, Blennow K, de Leon MJ. Plasma tau complements CSF tau and p-tau in the diagnosis of Alzheimer's disease. *Alzheimers Dement (Amst).* 2019; 11:483–92.  
<https://doi.org/10.1016/j.dadm.2019.05.001>  
PMID:[31334328](https://pubmed.ncbi.nlm.nih.gov/31334328/)
34. Müller S, Preische O, Göpfert JC, Yañez VA, Joos TO, Boecker H, Düzel E, Falkai P, Priller J, Buerger K, Catak C, Janowitz D, Heneka MT, et al. Tau plasma levels in subjective cognitive decline: results from the DELCODE study. *Sci Rep.* 2017; 7:9529.  
<https://doi.org/10.1038/s41598-017-08779-0>  
PMID:[28842559](https://pubmed.ncbi.nlm.nih.gov/28842559/)
35. Dage JL, Wennberg AM, Airey DC, Hagen CE, Knopman DS, Machulda MM, Roberts RO, Jack CR Jr, Petersen RC, Mielke MM. Levels of tau protein in plasma are associated with neurodegeneration and cognitive function in a population-based elderly cohort. *Alzheimers Dement.* 2016; 12:1226–34.  
<https://doi.org/10.1016/j.jalz.2016.06.001>  
PMID:[27436677](https://pubmed.ncbi.nlm.nih.gov/27436677/)
36. Nation DA, Sweeney MD, Montagne A, Sagare AP, D'Orazio LM, Pachicano M, Seppehrband F, Nelson AR, Buennagel DP, Harrington MG, Benzinger TL, Fagan AM, Ringman JM, et al. Blood-brain barrier breakdown is an early biomarker of human cognitive dysfunction. *Nat Med.* 2019; 25:270–76.  
<https://doi.org/10.1038/s41591-018-0297-y>  
PMID:[30643288](https://pubmed.ncbi.nlm.nih.gov/30643288/)
37. Chen TB, Lee YJ, Lin SY, Chen JP, Hu CJ, Wang PN, Cheng IH. Plasma A $\beta$ 42 and total tau predict cognitive decline in amnesic mild cognitive impairment. *Sci Rep.* 2019; 9:13984.  
<https://doi.org/10.1038/s41598-019-50315-9>  
PMID:[31562355](https://pubmed.ncbi.nlm.nih.gov/31562355/)
38. Yanamandra K, Patel TK, Jiang H, Schindler S, Ulrich JD, Boxer AL, Miller BL, Kerwin DR, Gallardo G, Stewart F, Finn MB, Cairns NJ, Verghese PB, et al. Anti-tau antibody administration increases plasma tau in transgenic mice and patients with tauopathy. *Sci Transl Med.* 2017; 9:eaal2029.  
<https://doi.org/10.1126/scitranslmed.aal2029>  
PMID:[28424326](https://pubmed.ncbi.nlm.nih.gov/28424326/)
39. Böhm P, Peña-Casanova J, Aguilar M, Hernández G, Sol JM, Blesa R. Clinical validity and utility of the interview for deterioration of daily living in dementia for spanish-speaking communities NORMACODEM group. *Int Psychogeriatr.* 1998; 10:261–70.  
<https://doi.org/10.1017/s1041610298005377>  
PMID:[9785147](https://pubmed.ncbi.nlm.nih.gov/9785147/)
40. Yesavage JA, Brink TL, Rose TL, Lum O, Huang V, Adey M, Leirer VO. Development and validation of a geriatric depression screening scale: a preliminary report. *J Psychiatr Res.* 1982; 17:37–49.  
[https://doi.org/10.1016/0022-3956\(82\)90033-4](https://doi.org/10.1016/0022-3956(82)90033-4)  
PMID:[7183759](https://pubmed.ncbi.nlm.nih.gov/7183759/)
41. Gilewski MJ, Zelinski EM, Schaie KW. The memory functioning questionnaire for assessment of memory complaints in adulthood and old age. *Psychol Aging.* 1990; 5:482–90.  
<https://doi.org/10.1037//0882-7974.5.4.482>  
PMID:[2278670](https://pubmed.ncbi.nlm.nih.gov/2278670/)
42. Fischl B, Dale AM. Measuring the thickness of the human cerebral cortex from magnetic resonance images. *Proc Natl Acad Sci USA.* 2000; 97:11050–55.  
<https://doi.org/10.1073/pnas.200033797>  
PMID:[10984517](https://pubmed.ncbi.nlm.nih.gov/10984517/)
43. Bernal-Rusiel JL, Atienza M, Cantero JL. Detection of focal changes in human cortical thickness: spherical wavelets versus gaussian smoothing. *Neuroimage.* 2008; 41:1278–92.  
<https://doi.org/10.1016/j.neuroimage.2008.03.022>  
PMID:[18474434](https://pubmed.ncbi.nlm.nih.gov/18474434/)
44. Bernal-Rusiel JL, Atienza M, Cantero JL. Determining the optimal level of smoothing in cortical thickness analysis: a hierarchical approach based on sequential statistical thresholding. *Neuroimage.* 2010; 52:158–71.  
<https://doi.org/10.1016/j.neuroimage.2010.03.074>  
PMID:[20362677](https://pubmed.ncbi.nlm.nih.gov/20362677/)
45. Wen Z, Fan X. Monotonicity of effect sizes: questioning kappa-squared as mediation effect size measure. *Psychol Methods.* 2015; 20:193–203.  
<https://doi.org/10.1037/met0000029> PMID:[25664380](https://pubmed.ncbi.nlm.nih.gov/25664380/)

46. Götz J, Chen F, van Dorpe J, Nitsch RM. Formation of neurofibrillary tangles in P301l tau transgenic mice induced by abeta 42 fibrils. *Science*. 2001; 293:1491–95.  
<https://doi.org/10.1126/science.1062097>  
PMID:[11520988](https://pubmed.ncbi.nlm.nih.gov/11520988/)
47. Lewis J, Dickson DW, Lin WL, Chisholm L, Corral A, Jones G, Yen SH, Sahara N, Skipper L, Yager D, Eckman C, Hardy J, Hutton M, McGowan E. Enhanced neurofibrillary degeneration in transgenic mice expressing mutant tau and APP. *Science*. 2001; 293:1487–91.  
<https://doi.org/10.1126/science.1058189>  
PMID:[11520987](https://pubmed.ncbi.nlm.nih.gov/11520987/)
48. Marks SM, Lockhart SN, Baker SL, Jagust WJ. Tau and  $\beta$ -amyloid are associated with medial temporal lobe structure, function, and memory encoding in normal aging. *J Neurosci*. 2017; 37:3192–201.  
<https://doi.org/10.1523/JNEUROSCI.3769-16.2017>  
PMID:[28213439](https://pubmed.ncbi.nlm.nih.gov/28213439/)
49. Pakkenberg B, Gundersen HJ. Neocortical neuron number in humans: effect of sex and age. *J Comp Neurol*. 1997; 384:312–20.  
PMID:[9215725](https://pubmed.ncbi.nlm.nih.gov/9215725/)
50. von Bartheld CS. Myths and truths about the cellular composition of the human brain: a review of influential concepts. *J Chem Neuroanat*. 2018; 93:2–15.  
<https://doi.org/10.1016/j.jchemneu.2017.08.004>  
PMID:[28873338](https://pubmed.ncbi.nlm.nih.gov/28873338/)
51. Reijs BL, Ramakers IH, Köhler S, Teunissen CE, Koel-Simmelink M, Nathan PJ, Tsolaki M, Wahlund LO, Waldemar G, Hausner L, Vandenberghe R, Johannsen P, Blackwell A, et al. Memory correlates of Alzheimer’s disease cerebrospinal fluid markers: a longitudinal cohort study. *J Alzheimers Dis*. 2017; 60:1119–28.  
<https://doi.org/10.3233/JAD-160766>  
PMID:[28984585](https://pubmed.ncbi.nlm.nih.gov/28984585/)
52. Bos I, Vos SJ, Jansen WJ, Vandenberghe R, Gabel S, Estanga A, Ecay-Torres M, Tomassen J, den Braber A, Lleó A, Sala I, Wallin A, Kettunen P, et al, and Alzheimer’s Disease Neuroimaging Initiative. Amyloid- $\beta$ , tau, and cognition in cognitively normal older individuals: examining the necessity to adjust for biomarker status in normative data. *Front Aging Neurosci*. 2018; 10:193.  
<https://doi.org/10.3389/fnagi.2018.00193>  
PMID:[29988624](https://pubmed.ncbi.nlm.nih.gov/29988624/)
53. Hedden T, Oh H, Younger AP, Patel TA. Meta-analysis of amyloid-cognition relations in cognitively normal older adults. *Neurology*. 2013; 80:1341–48.  
<https://doi.org/10.1212/WNL.0b013e31828ab35d>  
PMID:[23547267](https://pubmed.ncbi.nlm.nih.gov/23547267/)
54. Petersen RC, Wiste HJ, Weigand SD, Rocca WA, Roberts RO, Mielke MM, Lowe VJ, Knopman DS, Pankratz VS, Machulda MM, Geda YE, Jack CR Jr. Association of elevated amyloid levels with cognition and biomarkers in cognitively normal people from the community. *JAMA Neurol*. 2016; 73:85–92.  
<https://doi.org/10.1001/jamaneurol.2015.3098>  
PMID:[26595683](https://pubmed.ncbi.nlm.nih.gov/26595683/)
55. Farrell ME, Kennedy KM, Rodrigue KM, Wig G, Bischoff GN, Rieck JR, Chen X, Festini SB, Devous MD Sr, Park DC. Association of longitudinal cognitive decline with amyloid burden in middle-aged and older adults: evidence for a dose-response relationship. *JAMA Neurol*. 2017; 74:830–38.  
<https://doi.org/10.1001/jamaneurol.2017.0892>  
PMID:[28558099](https://pubmed.ncbi.nlm.nih.gov/28558099/)
56. Pettigrew C, Soldan A, Moghekar A, Wang MC, Gross AL, O’Brien R, Albert M. Relationship between cerebrospinal fluid biomarkers of Alzheimer’s disease and cognition in cognitively normal older adults. *Neuropsychologia*. 2015; 78:63–72.  
<https://doi.org/10.1016/j.neuropsychologia.2015.09.024> PMID:[26394023](https://pubmed.ncbi.nlm.nih.gov/26394023/)
57. Schöll M, Lockhart SN, Schonhaut DR, O’Neil JP, Janabi M, Ossenkoppele R, Baker SL, Vogel JW, Faria J, Schwimmer HD, Rabinovici GD, Jagust WJ. PET imaging of tau deposition in the aging human brain. *Neuron*. 2016; 89:971–82.  
<https://doi.org/10.1016/j.neuron.2016.01.028>  
PMID:[26938442](https://pubmed.ncbi.nlm.nih.gov/26938442/)
58. Maass A, Lockhart SN, Harrison TM, Bell RK, Mellinger T, Swinnerton K, Baker SL, Rabinovici GD, Jagust WJ. Entorhinal tau pathology, episodic memory decline, and neurodegeneration in aging. *J Neurosci*. 2018; 38:530–43.  
<https://doi.org/10.1523/JNEUROSCI.2028-17.2017>  
PMID:[29192126](https://pubmed.ncbi.nlm.nih.gov/29192126/)
59. Ziontz J, Bilgel M, Shafer AT, Moghekar A, Elkins W, Hephrey J, Gomez G, June D, McDonald MA, Dannals RF, Azad BB, Ferrucci L, Wong DF, Resnick SM. Tau pathology in cognitively normal older adults. *Alzheimers Dement (Amst)*. 2019; 11:637–45.  
<https://doi.org/10.1016/j.dadm.2019.07.007>  
PMID:[31517026](https://pubmed.ncbi.nlm.nih.gov/31517026/)
60. Harrison TM, Maass A, Adams JN, Du R, Baker SL, Jagust WJ. Tau deposition is associated with functional isolation of the hippocampus in aging. *Nat Commun*. 2019; 10:4900.  
<https://doi.org/10.1038/s41467-019-12921-z>  
PMID:[31653847](https://pubmed.ncbi.nlm.nih.gov/31653847/)
61. Mielke MM, Hagen CE, Wennberg AM, Airey DC, Savica R, Knopman DS, Machulda MM, Roberts RO, Jack CR Jr, Petersen RC, Dage JL. Association of plasma total tau



- level with cognitive decline and risk of mild cognitive impairment or dementia in the mayo clinic study on aging. *JAMA Neurol.* 2017; 74:1073–80.  
<https://doi.org/10.1001/jamaneurol.2017.1359>  
PMID:[28692710](https://pubmed.ncbi.nlm.nih.gov/28692710/)
62. Pase MP, Beiser AS, Himali JJ, Satizabal CL, Aparicio HJ, DeCarli C, Chêne G, Dufouil C, Seshadri S. Assessment of plasma total tau level as a predictive biomarker for dementia and related endophenotypes. *JAMA Neurol.* 2019; 76:598–606.  
<https://doi.org/10.1001/jamaneurol.2018.4666>  
PMID:[30830207](https://pubmed.ncbi.nlm.nih.gov/30830207/)
  63. Blennow K, Dubois B, Fagan AM, Lewczuk P, de Leon MJ, Hampel H. Clinical utility of cerebrospinal fluid biomarkers in the diagnosis of early Alzheimer’s disease. *Alzheimers Dement.* 2015; 11:58–69.  
<https://doi.org/10.1016/j.jalz.2014.02.004>  
PMID:[24795085](https://pubmed.ncbi.nlm.nih.gov/24795085/)
  64. Palmqvist S, Insel PS, Stomrud E, Janelidze S, Zetterberg H, Brix B, Eichenlaub U, Dage JL, Chai X, Blennow K, Mattsson N, Hansson O. Cerebrospinal fluid and plasma biomarker trajectories with increasing amyloid deposition in Alzheimer’s disease. *EMBO Mol Med.* 2019; 11:e11170.  
<https://doi.org/10.15252/emmm.201911170>  
PMID:[31709776](https://pubmed.ncbi.nlm.nih.gov/31709776/)
  65. Waldorff FB, Siersma V, Vogel A, Waldemar G. Subjective memory complaints in general practice predicts future dementia: a 4-year follow-up study. *Int J Geriatr Psychiatry.* 2012; 27:1180–88.  
<https://doi.org/10.1002/gps.3765>  
PMID:[22253004](https://pubmed.ncbi.nlm.nih.gov/22253004/)
  66. Abner EL, Kryscio RJ, Caban-Holt AM, Schmitt FA. Baseline subjective memory complaints associate with increased risk of incident dementia: the PREADVICE trial. *J Prev Alzheimers Dis.* 2015; 2:11–16.  
<https://doi.org/10.14283/jpad.2015.37>  
PMID:[26180776](https://pubmed.ncbi.nlm.nih.gov/26180776/)
  67. Luck T, Lippa M, Matschinger H, Jessen F, Angermeyer MC, Riedel-Heller SG. Incident subjective memory complaints and the risk of subsequent dementia. *Acta Psychiatr Scand.* 2015; 131:290–96.  
<https://doi.org/10.1111/acps.12328>  
PMID:[25201166](https://pubmed.ncbi.nlm.nih.gov/25201166/)
  68. Tsutsumimoto K, Makizako H, Doi T, Hotta R, Nakakubo S, Makino K, Shimada H, Suzuki T. Subjective Memory Complaints are Associated with Incident Dementia in Cognitively Intact Older People, but Not in Those with Cognitive Impairment: A 24-Month Prospective Cohort Study. *Am J Geriatr Psychiatry.* 2017; 25:607–616.  
<https://doi.org/10.1016/j.jagp.2016.12.008>  
PMID:[28216174](https://pubmed.ncbi.nlm.nih.gov/28216174/)
  69. Amariglio RE, Becker JA, Carmasin J, Wadsworth LP, Lorus N, Sullivan C, Maye JE, Gidicsin C, Pepin LC, Sperling RA, Johnson KA, Rentz DM. Subjective cognitive complaints and amyloid burden in cognitively normal older individuals. *Neuropsychologia.* 2012; 50:2880–86.  
<https://doi.org/10.1016/j.neuropsychologia.2012.08.011>  
PMID:[22940426](https://pubmed.ncbi.nlm.nih.gov/22940426/)
  70. Llado-Saz S, Atienza M, Cantero JL. Increased levels of plasma amyloid-beta are related to cortical thinning and cognitive decline in cognitively normal elderly subjects. *Neurobiol Aging.* 2015; 36:2791–97.  
<https://doi.org/10.1016/j.neurobiolaging.2015.06.023>  
PMID:[26182906](https://pubmed.ncbi.nlm.nih.gov/26182906/)
  71. Cantero JL, Iglesias JE, Van Leemput K, Atienza M. Regional hippocampal atrophy and higher levels of plasma amyloid-beta are associated with subjective memory complaints in nondemented elderly subjects. *J Gerontol A Biol Sci Med Sci.* 2016; 71:1210–15.  
<https://doi.org/10.1093/gerona/glw022>  
PMID:[26946100](https://pubmed.ncbi.nlm.nih.gov/26946100/)
  72. Vannini P, Hanseeuw B, Munro CE, Amariglio RE, Marshall GA, Rentz DM, Pascual-Leone A, Johnson KA, Sperling RA. Hippocampal hypometabolism in older adults with memory complaints and increased amyloid burden. *Neurology.* 2017; 88:1759–67.  
<https://doi.org/10.1212/WNL.0000000000003889>  
PMID:[28381517](https://pubmed.ncbi.nlm.nih.gov/28381517/)
  73. de Leon MJ, Pirraglia E, Osorio RS, Glodzik L, Saint-Louis L, Kim HJ, Fortea J, Fossati S, Laska E, Siegel C, Butler T, Li Y, Rusinek H, et al, Alzheimer’s Disease Neuroimaging Initiative, and National Alzheimer’s Coordinating Center. The nonlinear relationship between cerebrospinal fluid A $\beta$ 42 and tau in preclinical Alzheimer’s disease. *PLoS One.* 2018; 13:e0191240.  
<https://doi.org/10.1371/journal.pone.0191240>  
PMID:[29415068](https://pubmed.ncbi.nlm.nih.gov/29415068/)
  74. Schupf N, Tang MX, Fukuyama H, Manly J, Andrews H, Mehta P, Ravetch J, Mayeux R. Peripheral abeta subspecies as risk biomarkers of Alzheimer’s disease. *Proc Natl Acad Sci USA.* 2008; 105:14052–57.  
<https://doi.org/10.1073/pnas.0805902105>  
PMID:[18779561](https://pubmed.ncbi.nlm.nih.gov/18779561/)
  75. Cosentino SA, Stern Y, Sokolov E, Scarmeas N, Manly JJ, Tang MX, Schupf N, Mayeux RP. Plasma  $\beta$ -amyloid and cognitive decline. *Arch Neurol.* 2010; 67:1485–90.  
<https://doi.org/10.1001/archneurol.2010.189>  
PMID:[20697031](https://pubmed.ncbi.nlm.nih.gov/20697031/)
  76. Stakos DA, Stamatiopoulos K, Bampatsias D, Sachse M, Zormpas E, Vlachogiannis NI, Tual-Chalot S, Stellos K. The Alzheimer’s disease amyloid-beta hypothesis in cardiovascular aging and disease: JACC focus seminar. *J Am Coll Cardiol.* 2020; 75:952–67.

<https://doi.org/10.1016/j.jacc.2019.12.033>

PMID:[32130931](https://pubmed.ncbi.nlm.nih.gov/32130931/)

77. Kakuda N, Miyasaka T, Iwasaki N, Nirasawa T, Wada-Kakuda S, Takahashi-Fujigasaki J, Murayama S, Ihara Y, Ikegawa M. Distinct deposition of amyloid- $\beta$  species in brains with Alzheimer's disease pathology visualized with MALDI imaging mass spectrometry. *Acta Neuropathol Commun*. 2017; 5:73.  
<https://doi.org/10.1186/s40478-017-0477-x>  
PMID:[29037261](https://pubmed.ncbi.nlm.nih.gov/29037261/)
78. Koyama A, Okereke OI, Yang T, Blacker D, Selkoe DJ, Grodstein F. Plasma amyloid- $\beta$  as a predictor of dementia and cognitive decline: a systematic review and meta-analysis. *Arch Neurol*. 2012; 69:824–31.  
<https://doi.org/10.1001/archneurol.2011.1841>  
PMID:[22451159](https://pubmed.ncbi.nlm.nih.gov/22451159/)
79. Mayeli M, Mirshahvalad SM, Aghamollai V, Tafakhori A, Abdolalizadeh A, Rahmani F. Plasma neurofilament light chain levels are associated with cortical hypometabolism in Alzheimer disease signature regions. *J Neuropathol Exp Neurol*. 2019. [Epub ahead of print].  
<https://doi.org/10.1093/jnen/nlz054> PMID:[31305887](https://pubmed.ncbi.nlm.nih.gov/31305887/)
80. Rowe CC, Ng S, Ackermann U, Gong SJ, Pike K, Savage G, Cowie TF, Dickinson KL, Maruff P, Darby D, Smith C, Woodward M, Merory J, et al. Imaging beta-amyloid burden in aging and dementia. *Neurology*. 2007; 68:1718–25.  
<https://doi.org/10.1212/01.wnl.0000261919.22630.ea>  
PMID:[17502554](https://pubmed.ncbi.nlm.nih.gov/17502554/)
81. Valla J, Berndt JD, Gonzalez-Lima F. Energy hypometabolism in posterior cingulate cortex of Alzheimer's patients: superficial laminar cytochrome oxidase associated with disease duration. *J Neurosci*. 2001; 21:4923–30.  
<https://doi.org/10.1523/JNEUROSCI.21-13-04923.2001>  
PMID:[11425920](https://pubmed.ncbi.nlm.nih.gov/11425920/)
82. Lee JS, Park YH, Park S, Yoon U, Choe Y, Cheon BK, Hahn A, Cho SH, Kim SJ, Kim JP, Jung YH, Park KC, Kim HJ, et al. Distinct brain regions in physiological and pathological brain aging. *Front Aging Neurosci*. 2019; 11:147.  
<https://doi.org/10.3389/fnagi.2019.00147>  
PMID:[31275140](https://pubmed.ncbi.nlm.nih.gov/31275140/)
83. Sun P, Lou W, Liu J, Shi L, Li K, Wang D, Mok VC, Liang P. Mapping the patterns of cortical thickness in single- and multiple-domain amnesic mild cognitive impairment patients: a pilot study. *Aging (Albany NY)*. 2019; 11:10000–15.  
<https://doi.org/10.18632/aging.102362> PMID:[31756169](https://pubmed.ncbi.nlm.nih.gov/31756169/)
84. Kang DW, Choi WH, Jung WS, Um YH, Lee CU, Lim HK. Impact of amyloid burden on regional functional synchronization in the cognitively normal older adults. *Sci Rep*. 2017; 7:14690.  
<https://doi.org/10.1038/s41598-017-15001-8>  
PMID:[29089631](https://pubmed.ncbi.nlm.nih.gov/29089631/)
85. Cantero JL, Zaborszky L, Atienza M. Volume loss of the nucleus basalis of meynert is associated with atrophy of innervated regions in mild cognitive impairment. *Cereb Cortex*. 2017; 27:3881–89.  
<https://doi.org/10.1093/cercor/bhw195>  
PMID:[27371762](https://pubmed.ncbi.nlm.nih.gov/27371762/)
86. Chiu MJ, Fan LY, Chen TF, Chen YF, Chieh JJ, Horng HE. Plasma tau levels in cognitively normal middle-aged and older adults. *Front Aging Neurosci*. 2017; 9:51.  
<https://doi.org/10.3389/fnagi.2017.00051>  
PMID:[28321189](https://pubmed.ncbi.nlm.nih.gov/28321189/)
87. Cao X, Xu H, Feng W, Su D, Xiao M. Deletion of aquaporin-4 aggravates brain pathology after blocking of the meningeal lymphatic drainage. *Brain Res Bull*. 2018; 143:83–96.  
<https://doi.org/10.1016/j.brainresbull.2018.10.007>  
PMID:[30347264](https://pubmed.ncbi.nlm.nih.gov/30347264/)
88. Patel TK, Habimana-Griffin L, Gao X, Xu B, Achilefu S, Alitalo K, McKee CA, Sheehan PW, Musiek ES, Xiong C, Coble D, Holtzman DM. Dural lymphatics regulate clearance of extracellular tau from the CNS. *Mol Neurodegener*. 2019; 14:11.  
<https://doi.org/10.1186/s13024-019-0312-x>  
PMID:[30813965](https://pubmed.ncbi.nlm.nih.gov/30813965/)
89. Parodi-Rullán R, Sone JY, Fossati S. Endothelial mitochondrial dysfunction in cerebral amyloid angiopathy and Alzheimer's disease. *J Alzheimers Dis*. 2019; 72:1019–39.  
<https://doi.org/10.3233/JAD-190357>  
PMID:[31306129](https://pubmed.ncbi.nlm.nih.gov/31306129/)
90. Ramos-Cejudo J, Wisniewski T, Marmar C, Zetterberg H, Blennow K, de Leon MJ, Fossati S. Traumatic brain injury and Alzheimer's disease: the cerebrovascular link. *EBioMedicine*. 2018; 28:21–30.  
<https://doi.org/10.1016/j.ebiom.2018.01.021>  
PMID:[29396300](https://pubmed.ncbi.nlm.nih.gov/29396300/)
91. Yanamandra K, Jiang H, Mahan TE, Maloney SE, Wozniak DF, Diamond MI, Holtzman DM. Anti-tau antibody reduces insoluble tau and decreases brain atrophy. *Ann Clin Transl Neurol*. 2015; 2:278–88.  
<https://doi.org/10.1002/acn3.176> PMID:[25815354](https://pubmed.ncbi.nlm.nih.gov/25815354/)
92. Wang J, Jin WS, Bu XL, Zeng F, Huang ZL, Li WW, Shen LL, Zhuang ZQ, Fang Y, Sun BL, Zhu J, Yao XQ, Zeng GH, et al. Physiological clearance of tau in the periphery and its therapeutic potential for tauopathies. *Acta Neuropathol*. 2018; 136:525–36.  
<https://doi.org/10.1007/s00401-018-1891-2>  
PMID:[30074071](https://pubmed.ncbi.nlm.nih.gov/30074071/)

93. Cho H, Choi JY, Hwang MS, Lee JH, Kim YJ, Lee HM, Lyoo CH, Ryu YH, Lee MS. Tau PET in Alzheimer disease and mild cognitive impairment. *Neurology*. 2016; 87:375–83.  
<https://doi.org/10.1212/WNL.0000000000002892>  
PMID:[27358341](https://pubmed.ncbi.nlm.nih.gov/27358341/)
94. Dowling NM, Johnson SC, Gleason CE, Jagust WJ; Alzheimer's Disease Neuroimaging Initiative. The mediational effects of FDG hypometabolism on the association between cerebrospinal fluid biomarkers and neurocognitive function. *Neuroimage*. 2015; 105:357–68.
95. Bejanin A, Schonhaut DR, La Joie R, Kramer JH, Baker SL, Sosa N, Ayakta N, Cantwell A, Janabi M, Lauriola M, O'Neil JP, Gorno-Tempini ML, Miller ZA, et al. Tau pathology and neurodegeneration contribute to cognitive impairment in Alzheimer's disease. *Brain*. 2017; 140:3286–300.  
<https://doi.org/10.1093/brain/awx243>  
PMID:[29053874](https://pubmed.ncbi.nlm.nih.gov/29053874/)
